# Supplementary material for: The influence of PKA treatment on the Ca2+ activation of force generation by trout cardiac muscle
Source: Oxford University Press journal article supplement (doi:10.1242/jeb.052084), 2011-05-25
Supplement: jeb052084figs1.pdf [file jeb052084figs1.pdf]

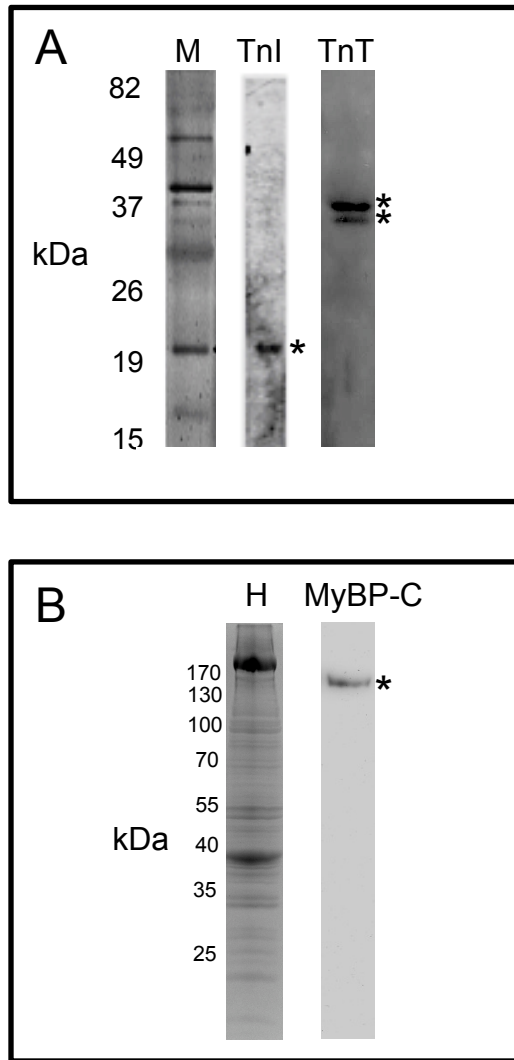

Figure 1. **Composite image showing results of western blotting to identify cTnI, cTnT and MyBP-C.** Panel A: lane 1 is trout cardiac myofilament proteins (M) stained with coomassie blue for total protein, lane 2 is western blot of trout myofilament proteins probed with antibody for mammalian cardiac troponin I, lane 3 is western blot of trout myofilament proteins probed with antibody for mammalian cardiac troponin T. Panel B, lane 1 is whole trout heart homogenate (H) stained with coomassie blue, lane 2 is a western blot of whole trout heart homogenate with antibody for rat cardiac myosin binding protein C. \* is used to identify protein band
