# Supplementary material for: The influence of PKA treatment on the Ca2+ activation of force generation by trout cardiac muscle
Source: Oxford University Press journal article supplement (doi:10.1242/jeb.052084), 2011-05-25
Supplement: jeb052084figs2.pdf [file jeb052084figs2.pdf]

MAPKKAKR **RG AAAEGGSSNV FSMFEQSQIQ EYKEAFTIID QNRDGIIS**SKD 51  
DLRDVLASMG QLNVK **NEELE AMVKEASGPI NFTVFLTM**FG EKLKGADPED 101  
VIVSAFKVLD PEATGFIKKE FLQELLTTC DRFSAEEMK **N LWAAFPPDVA** 151  
**GNVDYKQICYV**THGEEKEE

**Figure 2. The results of Nano-LC-QTOF mass spectroscopy sequence analysis of in gel trypsin digested native trout cardiac myosin regulatory light chain 2 mapped onto the amino acid sequence of Atlantic salmon cardiac myosin regulatory light chain 2.** The boxes indicate peptides that matched between the sample and the sequence. A display score of 79% with 48% coverage was obtained indicating a positive match.
